# Supplementary material
Source: PubMed Central journal article supplement (PMC4074924)

## Figure S1. Model elements

Elements included in our network model, and references to related work that show relevance of elements for the T cell differentiation.

| <b>Element</b>         | <b>Definition</b>                                                       | <b>References</b> |
|------------------------|-------------------------------------------------------------------------|-------------------|
| TCR                    | T cell receptor                                                         | (1)               |
| CD28                   | CD28 receptor                                                           | (2)               |
| Ras                    | Ras                                                                     | (3, 4)            |
| Raf                    | Raf kinase, effector of Ras                                             | (3, 4)            |
| TAK1                   | mitogen-activated protein kinase kinase kinase 7                        | (3, 4)            |
| MEK2                   | mitogen-activated protein kinase kinase 2                               | (3, 4)            |
| MKK7                   | mitogen-activated protein kinase kinase 7                               | (3, 4)            |
| ERK                    | MAPK 1/elk related kinase                                               | (3, 4)            |
| JNK                    | Jun kinase                                                              | (5)               |
| Fos                    | c-Fos proto-oncogene                                                    | (5)               |
| Jun                    | c-Jun proto-oncogene                                                    | (5)               |
| AP-1                   | Fos/Jun complex                                                         | (5)               |
| Ca <sup>2+</sup>       | Calcium                                                                 | (6)               |
| NF-AT                  | Nuclear factor of activated T cells                                     | (6)               |
| PKC- $\theta$          | Protein kinase C- $\theta$                                              | (7-9)             |
| NF- $\kappa$ B         | Nuclear factor of kappa light polypeptide gene enhancer in B-cells 1, 2 | (10, 11)          |
| PI3K                   | Phosphoinositide-3-kinase                                               | (12)              |
| PIP3                   | Phosphatidylinositol (3,4,5)-trisphosphate                              | (12)              |
| PDK1                   | 3-phosphoinositide dependent protein kinase-1                           | (12, 13)          |
| PTEN                   | Phosphatase and tensin homolog                                          | (14)              |
| Akt                    | Akt (Protein kinase B)                                                  | (15, 16)          |
| TSC1-TSC2              | Tuberous sclerosis protein 1 and 2                                      | (13, 15)          |
| RHEB                   | Ras homolog enriched in brain                                           | (13, 15)          |
| mTORC1                 | Mammalian target of rapamycin 1                                         | (13, 15)          |
| S6K1                   | Ribosomal protein S6 kinase                                             | (13, 15)          |
| mTORC2                 | Mammalian target of rapamycin 2                                         | (13, 15)          |
| pS6                    | Ribosomal protein S6                                                    | (13, 15)          |
| SMAD3                  | SMAD family member 3                                                    | (17)              |
| IL-2 ex                | Interleukin 2, exogenous                                                | (18)              |
| Foxp3                  | Forkhead box P3                                                         | (19)              |
| IL-2                   | Interleukin 2                                                           | (20, 21)          |
| IL-2R $\alpha$ (CD25)  | Interleukin 2 receptor $\alpha$                                         | (20, 21)          |
| IL-2R $\beta$ (CD122)  | Interleukin 2 receptor $\beta$                                          | (20, 21)          |
| IL-2R $\gamma$ (CD132) | Interleukin 2 receptor $\gamma$                                         | (20, 21)          |
| TGF- $\beta$           | Transforming growth factor $\beta$                                      | (22)              |
| TGF- $\beta$ R         | Transforming growth factor $\beta$ receptor                             | (17)              |
| JAK3                   | Janus kinase 3                                                          | (21)              |
| STAT5                  | Signal transducer and activator of transcription 5                      | (21)              |

## Figure S2. Model rules

Description of logic rules in the model with supporting references.

| Logical rule                                                                                                                                                                   | Description and references                                                                                                                                                                                                                                                                                                                                                                                                                                                                                               |
|--------------------------------------------------------------------------------------------------------------------------------------------------------------------------------|--------------------------------------------------------------------------------------------------------------------------------------------------------------------------------------------------------------------------------------------------------------------------------------------------------------------------------------------------------------------------------------------------------------------------------------------------------------------------------------------------------------------------|
| 1 TCR' = TCR_LOW or TCR_HIGH                                                                                                                                                   | <i>Overall activation of TCR, model related.</i> T cell receptor-related variable (TCR) can have value '1' if either low or high antigen dose is present. This specific variable is used in the model when low and high antigen dose have identical effects.                                                                                                                                                                                                                                                             |
| 2 RAS' = (TCR and CD28) or (RAS and IL2_EX and IL2R)                                                                                                                           | Ras is activated by signaling from TCR/CD28 (23, 24). Once signaling through IL-2R is established, it can help keep Ras active (25)                                                                                                                                                                                                                                                                                                                                                                                      |
| 3-6 RAF' = RAS, MEK2' = RAF, ERK' = MEK2, FOS' = ERK **                                                                                                                        | Activation of Fos. Although variables carry names of specific molecules, since this is a path that does not have any cross talk with other paths, the only aspect of it that matters in the model is the number of steps, as shown in Figure 2E. (26) (27)                                                                                                                                                                                                                                                               |
| 7 PKCTHETA' = TCR_HIGH or (TCR_LOW and CD28 and MTORC2)                                                                                                                        | PKC- $\theta$ is activated by signaling from TCR (9), if antigen dose presented to the cell is high. If the dose is low, additional activation signals come from CD28 and mTORC2 (28).                                                                                                                                                                                                                                                                                                                                   |
| 8 TAK1' = PKCTHETA                                                                                                                                                             | TAK1 is activated by PKC- $\theta$ (29, 30).                                                                                                                                                                                                                                                                                                                                                                                                                                                                             |
| 9-11 MKK7' = TAK1, JNK' = MKK7, JUN' = JNK                                                                                                                                     | Activation of Jun. (31) (5, 32)                                                                                                                                                                                                                                                                                                                                                                                                                                                                                          |
| 12 API' = FOS and JUN                                                                                                                                                          | AP-1 is activated when both Fos and Jun are active (32)                                                                                                                                                                                                                                                                                                                                                                                                                                                                  |
| 13-14 CA' = TCR, NFAT' = CA                                                                                                                                                    | Ca <sup>2+</sup> is activated by TCR, and NFAT is activated by Ca <sup>2+</sup> (33, 34)                                                                                                                                                                                                                                                                                                                                                                                                                                 |
| 15 NFKAPPAB' = PKCTHETA or AKT                                                                                                                                                 | NF $\kappa$ B is primarily activated by PKC- $\theta$ (8), but it can also be activated by Akt (11, 30, 35).                                                                                                                                                                                                                                                                                                                                                                                                             |
| 16 IL2' = ((API and NFAT and NFKAPPAB) or IL2) and not FOXP3                                                                                                                   | AP-1, NF $\kappa$ B and NFAT are the transcription factors necessary for IL-2 transcription. To be able to implement to distinguish between the cells that only transiently express IL-2 and those that actually secrete higher amount of IL-2, we include a positive feedback in IL-2 rule that will allow IL-2 to remain in the "on" state if it is active for two or more rounds (18).                                                                                                                                |
| 17 IL2R' = CD25 and CD122 and CD132                                                                                                                                            | IL-2 receptor is assumed to be active if all three parts are expressed on the surface of the cell: IL-2R $\alpha$ (CD25), IL-2R $\beta$ (CD122) and IL-2R $\gamma$ (CD132) (21, 36).                                                                                                                                                                                                                                                                                                                                     |
| 18-20 PI3K_LOW' = (TCR_LOW and CD28) or (PI3K_LOW and IL2_EX and IL2R)<br>PI3K_HIGH' = (TCR_HIGH and CD28) or (PI3K_HIGH and IL2_EX and IL2R)<br>PI3K' = PI3K_LOW or PI3K_HIGH | TCR signaling activates PI3K/Akt/mTOR network (37); activation by CD28 (38), downstream of IL-2 receptor (39). PI3K is represented using two Boolean variables to avoid oscillations in the mTORC1/mTORC2 loop (as described in the Results section). For PI3K to be activated, each PI3K variable in the model requires the corresponding TCR variable (low or high) and CD28 variable to have value '1'. Once active, PI3K can remain active if the signal from IL-2R reaches PI3K before it switches to "off" state." |
| 21-23 PIP3_LOW' = PI3K_LOW and not PTEN<br>PIP3_HIGH' = PI3K_HIGH and not PTEN<br>PIP3' = PIP3_LOW or PIP3_HIGH                                                                | PIP3 is activated by PI3K and it is inhibited by PTEN (14).                                                                                                                                                                                                                                                                                                                                                                                                                                                              |
| 24 PDK1' = PIP3                                                                                                                                                                | PDK1 connected directly to PIP3 (40).                                                                                                                                                                                                                                                                                                                                                                                                                                                                                    |
| 25 AKT' = PDK1 and MTORC2                                                                                                                                                      | Akt is activated after phosphorylation by both PDK1 (15) and mTORC2 (41, 42).                                                                                                                                                                                                                                                                                                                                                                                                                                            |
| 26-27 TSC' = not AKT, RHEB' = not TSC                                                                                                                                          | Akt is a negative regulator of TSC1-TSC2, which is a negative regulator of Rheb (13, 15, 43).                                                                                                                                                                                                                                                                                                                                                                                                                            |
| 28 MTORC1' = RHEB **                                                                                                                                                           | mTORC1 is activated by Rheb (15, 43).                                                                                                                                                                                                                                                                                                                                                                                                                                                                                    |
| 29 MTORC2' = PI3K_HIGH or (PI3K_LOW and not S6K1) **                                                                                                                           | mTORC2 is activated by high level of PI3K when a high dose of antigen is present, or with low level of PI3K when there is no inhibition by S6K1. Link from PI3K to mTORC2 (41), inhibition by S6K1 (13), (44)                                                                                                                                                                                                                                                                                                            |
| 30 MTOR' = MTORC1 and MTORC2 **                                                                                                                                                | <i>Overall activation of mTOR, model related</i>                                                                                                                                                                                                                                                                                                                                                                                                                                                                         |
| 31-32 S6K1' = MTORC1, PS6' = S6K1                                                                                                                                              | S6K1 is activated by mTORC1 and pS6 is activated by S6K1 (13, 43).                                                                                                                                                                                                                                                                                                                                                                                                                                                       |
| 33 SMAD3' = TGF $\beta$ BETA                                                                                                                                                   | Smad3 propagates signal from the TGF $\beta$ receptor (45, 46).                                                                                                                                                                                                                                                                                                                                                                                                                                                          |
| 34 JAK3' = IL2R and IL2_EX                                                                                                                                                     | JAK3 is activated by IL-2R signal once IL-2 (IL-2 exogenous) binds to the receptor (39, 45)                                                                                                                                                                                                                                                                                                                                                                                                                              |
| 35 STAT5' = JAK3 **                                                                                                                                                            | STAT5 is activated by JAK3 (45).                                                                                                                                                                                                                                                                                                                                                                                                                                                                                         |
| 36 FOXP3' = (((NFAT and AP-1 and STAT5) or STAT5) and not mTOR) or (NFAT and SMAD3)                                                                                            | Foxp3 is activated either by binding of STAT5 to its promoter (36, 47), or by binding of NFAT and Smad3 to its promoter (48). Activation by STAT5 can be inhibited by mTOR, while TGF $\beta$ signaling through Smad3 prevails over mTOR inhibition.                                                                                                                                                                                                                                                                     |
| 37 CD25' = (API and NFAT and NFKAPPAB) or STAT5 or Foxp3                                                                                                                       | IL-2R $\alpha$ (CD25) is activated by the same transcription factors as IL-2, or by STAT5, or Foxp3 (19, 49, 50).                                                                                                                                                                                                                                                                                                                                                                                                        |
| 38 PTEN' = (not TCR_HIGH and PTEN) or (not TCR_HIGH and FOXP3)                                                                                                                 | PTEN is at high levels in naïve T cells, and is inhibited by the signaling from TCR. Foxp3 promotes PTEN activity (51, 52). Also, once active after removal of the signal from TCR, PTEN can stay active (53).                                                                                                                                                                                                                                                                                                           |
| 39 IL2_EX' = IL2 or IL2_EX                                                                                                                                                     | We include IL-2 exogenous (IL2_EX) in the model to be able to distinguish between IL-2 that is secreted outside of the cell and IL-2 expression inside the cell. Since we simulate single cell, once IL-2 is expressed, it is assumed to stay outside of the cell in the form of IL-2 exogenous                                                                                                                                                                                                                          |

\*\* We also model additional delay for those elements.

1. A. Weiss, D. R. Littman, Signal transduction by lymphocyte antigen receptors. *Cell* **76**, 263-274 (1994).
2. P. S. Linsley, J. A. Ledbetter, The role of the CD28 receptor during T cell responses to antigen. *Annu Rev Immunol* **11**, 191-212 (1993).
3. J. L. Clements, N. J. Boerth, J. R. Lee, G. A. Koretzky, Integration of T cell receptor-dependent signaling pathways by adapter proteins. *Annu Rev Immunol* **17**, 89-108 (1999).
4. J. Blenis, Signal transduction via the MAP kinases: proceed at your own RSK. *Proc Natl Acad Sci U S A* **90**, 5889-5892 (1993).
5. V. C. Foletta, D. H. Segal, D. R. Cohen, Transcriptional regulation in the immune system: all roads lead to AP-1. *J Leukoc Biol* **63**, 139-152 (1998).
6. F. Macian, NFAT proteins: key regulators of T-cell development and function. *Nat Rev Immunol* **5**, 472-484 (2005).
7. G. Baier, D. Telford, L. Giampa, K. M. Coggeshall, G. Baier-Bitterlich, N. Isakov, A. Altman, Molecular cloning and characterization of PKC theta, a novel member of the protein kinase C (PKC) gene family expressed predominantly in hematopoietic cells. *Journal of Biological Chemistry* **268**, 4997-5004 (1993).
8. Z. Sun, C. W. Arendt, W. Ellmeier, E. M. Schaeffer, M. J. Sunshine, L. Gandhi, J. Annes, D. Petrzilka, A. Kupfer, P. L. Schwartzberg, D. R. Littman, PKC-theta is required for TCR-induced NF-kappaB activation in mature but not immature T lymphocytes. *Nature* **404**, 402-407 (2000).
9. N. Isakov, A. Altman, Protein kinase C(theta) in T cell activation. *Annu Rev Immunol* **20**, 761-794 (2002).
10. X. Lin, A. O'Mahony, Y. Mu, R. Geleziunas, W. C. Greene, Protein kinase C-theta participates in NF-kappaB activation induced by CD3-CD28 costimulation through selective activation of IkkappaB kinase beta. *Mol Cell Biol* **20**, 2933-2940 (2000).
11. J. Cheng, A. Montecalvo, L. P. Kane, Regulation of NF-kappaB induction by TCR/CD28. *Immunologic research* **50**, 113-117 (2011).
12. D. A. Fruman, G. Bismuth, Fine tuning the immune response with PI3K. *Immunological Reviews* **228**, 253-272 (2009).
13. E. Caron, S. Ghosh, Y. Matsuoka, D. Ashton-Beaucage, M. Therrien, S. Lemieux, C. Perreault, P. P. Roux, H. Kitano, A comprehensive map of the mTOR signaling network. *Mol Syst Biol* **6**, 453 (2010).
14. J. L. Buckler, X. Liu, L. A. Turka, Regulation of T-cell responses by PTEN. *Immunol Rev* **224**, 239-248 (2008).
15. P. T. Bhaskar, N. Hay, The two TORCs and Akt. *Dev Cell* **12**, 487-502 (2007).
16. L. P. Kane, A. Weiss, The PI-3 kinase/Akt pathway and T cell activation: pleiotropic pathways downstream of PIP3. *Immunological Reviews* **192**, 7-20 (2003).
17. M. O. Li, R. A. Flavell, TGF-  $\beta$  : A Master of All T Cell Trades. *Cell* **134**, 392-404 (2008).
18. T. R. Malek, The biology of interleukin-2. *Annu Rev Immunol* **26**, 453-479 (2008).
19. S. F. Ziegler, FOXP3: of mice and men. *Annu Rev Immunol* **24**, 209-226 (2006).
20. D. Busse, M. de la Rosa, K. Hobiger, K. Thurley, M. Flossdorf, A. Scheffold, T. Hofer, Competing feedback loops shape IL-2 signaling between helper and regulatory T lymphocytes in cellular microenvironments. *Proc Natl Acad Sci U S A* **107**, 3058-3063 (2010).
21. T. R. Malek, I. Castro, Interleukin-2 receptor signaling: at the interface between tolerance and immunity. *Immunity* **33**, 153-165 (2010).
22. G. M. Delgoffe, T. P. Kole, Y. Zheng, P. E. Zarek, K. L. Matthews, B. Xiao, P. F. Worley, S. C. Kozma, J. D. Powell, The mTOR kinase differentially regulates effector and regulatory T cell lineage commitment. *Immunity* **30**, 832-844 (2009).

23. N. A. Dower, S. L. Stang, D. A. Bottorff, J. O. Ebinu, P. Dickie, H. L. Ostergaard, J. C. Stone, RasGRP is essential for mouse thymocyte differentiation and TCR signaling. *Nat Immunol* **1**, 317-321 (2000).
24. J. Downward, J. D. Graves, P. H. Warne, S. Rayter, D. A. Cantrell, Stimulation of p21ras upon T-cell activation. *Nature* **346**, 719-723 (1990).
25. J. D. Graves, J. Downward, M. Izquierdo-Pastor, S. Rayter, P. H. Warne, D. A. Cantrell, The growth factor IL-2 activates p21ras proteins in normal human T lymphocytes. *J Immunol* **148**, 2417-2422 (1992).
26. M. Rincón, MAP-kinase signaling pathways in T cells. *Current Opinion in Immunology* **13**, 339-345 (2001).
27. A. K. Chakraborty, J. Das, Pairing computation with experimentation: a powerful coupling for understanding T cell signalling. *Nat Rev Immunol* **10**, 59-71 (2010).
28. K. Lee, P. Gudapati, S. Dragovic, C. Spencer, S. Joyce, N. Killeen, M. A. Magnuson, M. Boothby, Mammalian target of rapamycin protein complex 2 regulates differentiation of Th1 and Th2 cell subsets via distinct signaling pathways. *Immunity* **32**, 743-753 (2010).
29. Y. Y. Wan, H. Chi, M. Xie, M. D. Schneider, R. A. Flavell, The kinase TAK1 integrates antigen and cytokine receptor signaling for T cell development, survival and function. *Nat Immunol* **7**, 851-858 (2006).
30. A. Facciabene, G. T. Motz, G. Coukos, T-Regulatory Cells: Key Players in Tumor Immune Escape and Angiogenesis. *Cancer Research* **72**, 2162-2171 (2012).
31. R. J. Davis, Signal transduction by the JNK group of MAP kinases. *Cell* **103**, 239-252 (2000).
32. M. Zerial, L. Toschi, R. P. Ryseck, M. Schuermann, R. Muller, R. Bravo, The product of a novel growth factor activated gene, fos B, interacts with JUN proteins enhancing their DNA binding activity. *EMBO J* **8**, 805-813 (1989).
33. I. Baine, B. T. Abe, F. Macian, Regulation of T-cell tolerance by calcium/NFAT signaling. *Immunol Rev* **231**, 225-240 (2009).
34. M. R. Muller, A. Rao, NFAT, immunity and cancer: a transcription factor comes of age. *Nat Rev Immunol* **10**, 645-656 (2010).
35. J. Cheng, B. Phong, D. C. Wilson, R. Hirsch, L. P. Kane, Akt Fine-tunes NF- $\kappa$ B-dependent Gene Expression during T Cell Activation. *Journal of Biological Chemistry* **286**, 36076-36085 (2011).
36. M. A. Burchill, J. Yang, C. Vogtenhuber, B. R. Blazar, M. A. Farrar, IL-2 receptor beta-dependent STAT5 activation is required for the development of Foxp3<sup>+</sup> regulatory T cells. *J Immunol* **178**, 280-290 (2007).
37. L. Bruno, M. Merckenschlager, Directing T cell differentiation and function with small molecule inhibitors. *Cell Cycle* **7**, 2296-2298 (2008).
38. F. Pages, M. Ragueneau, R. Rottapel, A. Truneh, J. Nunes, J. Imbert, D. Olive, Binding of phosphatidylinositol-3-OH kinase to CD28 is required for T-cell signalling. *Nature* **369**, 327-329 (1994).
39. S. L. Gaffen, Signaling domains of the interleukin 2 receptor. *Cytokine* **14**, 63-77 (2001).
40. S. G. Park, J. Schulze-Luehrman, M. S. Hayden, N. Hashimoto, W. Ogawa, M. Kasuga, S. Ghosh, The kinase PDK1 integrates T cell antigen receptor and CD28 coreceptor signaling to induce NF-kappaB and activate T cells. *Nat Immunol* **10**, 158-166 (2009).
41. D. R. Alessi, L. R. Pearce, J. M. Garcia-Martinez, New Insights into mTOR Signaling: mTORC2 and Beyond. *Science Signaling* **2**, - (2009).
42. D. D. Sarbassov, D. A. Guertin, S. M. Ali, D. M. Sabatini, Phosphorylation and regulation of Akt/PKB by the rictor-mTOR complex. *Science* **307**, 1098-1101 (2005).
43. M. Laplante, D. M. Sabatini, mTOR signaling at a glance. *J Cell Sci* **122**, 3589-3594 (2009).

44. C. C. Dibble, J. M. Asara, B. D. Manning, Characterization of Rictor phosphorylation sites reveals direct regulation of mTOR complex 2 by S6K1. *Mol Cell Biol* **29**, 5657-5670 (2009).
45. J. Huehn, J. K. Polansky, A. Hamann, Epigenetic control of FOXP3 expression: the key to a stable regulatory T-cell lineage? *Nat Rev Immunol* **9**, 83-89 (2009).
46. R. Derynck, Y. E. Zhang, Smad-dependent and Smad-independent pathways in TGF-beta family signalling. *Nature* **425**, 577-584 (2003).
47. S. Z. Josefowicz, A. Rudensky, Control of regulatory T cell lineage commitment and maintenance. *Immunity* **30**, 616-625 (2009).
48. Y. Tone, K. Furuuchi, Y. Kojima, M. L. Tykocinski, M. I. Greene, M. Tone, Smad3 and NFAT cooperate to induce Foxp3 expression through its enhancer. *Nat Immunol* **9**, 194-202 (2008).
49. H. P. Kim, W. J. Leonard, The basis for TCR-mediated regulation of the IL-2 receptor alpha chain gene: role of widely separated regulatory elements. *EMBO J* **21**, 3051-3059 (2002).
50. S. Sakaguchi, T. Yamaguchi, T. Nomura, M. Ono, Regulatory T Cells and Immune Tolerance. *Cell* **133**, 775-787 (2008).
51. L. M. Francisco, V. H. Salinas, K. E. Brown, V. K. Vanguri, G. J. Freeman, V. K. Kuchroo, A. H. Sharpe, PD-L1 regulates the development, maintenance, and function of induced regulatory T cells. *J Exp Med* **206**, 3015-3029 (2009).
52. L. Strauss, M. Czystowska, M. Szajnik, M. Mandapathil, T. L. Whiteside, Differential responses of human regulatory T cells (Treg) and effector T cells to rapamycin. *PLoS One* **4**, e5994 (2009).
53. A. W. Thomson, H. R. Turnquist, G. Raimondi, Immunoregulatory functions of mTOR inhibition. *Nat Rev Immunol* **9**, 324-337 (2009).

**Figure S3.** Foxp3 and IL-2 behavior for different delay setups in high and low Ag dose scenarios

We studied Foxp3 and IL-2 response to changes in model delays for setups  $S_{D1}$ - $S_{D15}$  (Figure 2D), in high and low Ag dose scenarios. The results show that there is no qualitative difference in the behavior and steady state of these elements. For the high Ag dose scenario, we observe differences in transients, the magnitude and the time of the peak of transients. As expected, when the delay on Akt/mTOR pathway is much longer than the delay on MAPK pathway, the transient of Foxp3 in high Ag dose scenario is much higher (Panel A, top). Delaying MAPK pathway not only reduces the transient magnitude, but also shifts the peak to a later round (Panel A, middle and bottom). In contrast to the high Ag dose scenario, the only effect of delays observed in the low Ag dose scenario is shifting the IL-2 transient to a later round with the increase in MAPK pathway delay (Panel D). The plots show the percentage of trajectories with Foxp3+ (left) or IL-2+ (right) within 1000 trajectories. (A) Foxp3 behavior in high Ag dose scenario. (B) IL-2 behavior in high Ag dose scenario. (C) Foxp3 behavior in low Ag dose scenario. (D) IL-2 behavior in low Ag dose scenario.

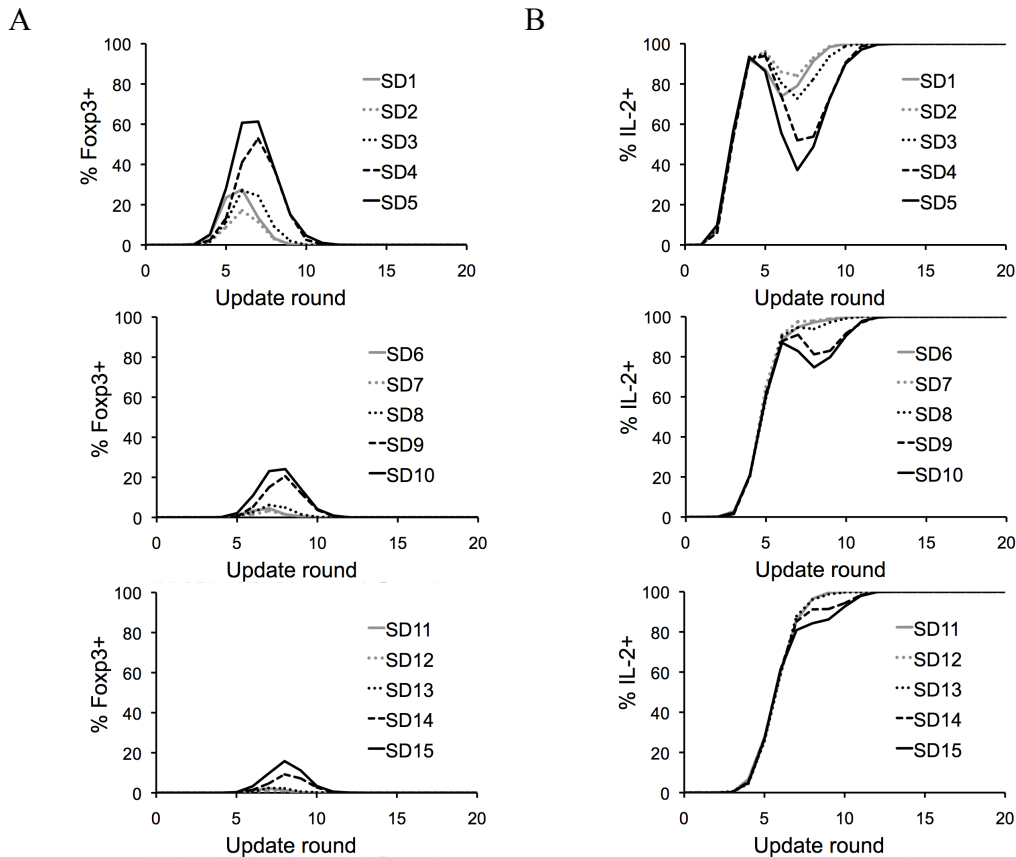



**Figure S4.** Initial element values for several scenarios

| <b>Element</b>         | <b>High Ag dose</b> | <b>Low Ag dose</b> | <b>High Ag dose + TGF-<math>\beta</math></b> |
|------------------------|---------------------|--------------------|----------------------------------------------|
| TCR*                   | 2                   | 1                  | 2                                            |
| CD28                   | 1                   | 1                  | 1                                            |
| Ras                    | 0                   | 0                  | 0                                            |
| Raf                    | 0                   | 0                  | 0                                            |
| TAK1                   | 0                   | 0                  | 0                                            |
| MEK2                   | 0                   | 0                  | 0                                            |
| MKK7                   | 0                   | 0                  | 0                                            |
| ERK                    | 0                   | 0                  | 0                                            |
| JNK                    | 0                   | 0                  | 0                                            |
| Fos                    | 0                   | 0                  | 0                                            |
| Jun                    | 0                   | 0                  | 0                                            |
| AP-1                   | 0                   | 0                  | 0                                            |
| Ca <sup>2+</sup>       | 0                   | 0                  | 0                                            |
| NF-AT                  | 0                   | 0                  | 0                                            |
| PKC- $\theta$          | 0                   | 0                  | 0                                            |
| NF- $\kappa$ B         | 0                   | 0                  | 0                                            |
| PI3K*                  | 0                   | 0                  | 0                                            |
| PIP3*                  | 0                   | 0                  | 0                                            |
| PDK1                   | 0                   | 0                  | 0                                            |
| PTEN                   | 1                   | 1                  | 1                                            |
| Akt                    | 0                   | 0                  | 0                                            |
| TSC1-TSC2              | 1                   | 1                  | 1                                            |
| RHEB                   | 0                   | 0                  | 0                                            |
| mTORC1                 | 0                   | 0                  | 0                                            |
| S6K1                   | 0                   | 0                  | 0                                            |
| mTORC2                 | 0                   | 0                  | 0                                            |
| pS6                    | 0                   | 0                  | 0                                            |
| SMAD3                  | 0                   | 0                  | 0                                            |
| IL-2 ex                | 0                   | 0                  | 0                                            |
| Foxp3                  | 0                   | 0                  | 0                                            |
| IL-2                   | 0                   | 0                  | 0                                            |
| IL-2R $\alpha$ (CD25)  | 0                   | 0                  | 0                                            |
| IL-2R $\beta$ (CD122)  | 1                   | 1                  | 1                                            |
| IL-2R $\gamma$ (CD132) | 1                   | 1                  | 1                                            |
| TGF- $\beta$           | 0                   | 0                  | 1                                            |
| TGF- $\beta$ R         | 0                   | 0                  | 1                                            |
| JAK3                   | 0                   | 0                  | 0                                            |
| STAT5                  | 0                   | 0                  | 0                                            |

\*These elements are encoded with two variables.



**Figure S5.** Computation of numbers for heat maps

(A) Decimal numbers from trajectory heat maps are computed according to Gray code, which always switches only a single bit between two consecutive decimal values (e.g., (0010 in Gray code) = (3 in decimal) and (0110 in Gray code) = (4 in decimal)), while binary code computes corresponding decimal value according digit position (e.g., (0110 in binary) =  $(0*2^3 + 1*2^2 + 1*2^1 + 0*2^0 = 6$  in decimal)). (B) Examples of encoding two different states in terms of ten element values (Foxp3, IL-2, PTEN, TCR, Ras, CD25, PI3K, Akt, mTORC1, mTORC2).

**A**

| Decimal<br>(used in heat maps) | Gray code<br>(used to compute decimal<br>numbers) | Binary code |
|--------------------------------|---------------------------------------------------|-------------|
| 0                              | 0000                                              | 0000        |
| 1                              | 0001                                              | 0001        |
| 2                              | 0011                                              | 0010        |
| 3                              | 0010                                              | 0011        |
| 4                              | 0110                                              | 0100        |
| 5                              | 0111                                              | 0101        |
| 6                              | 0101                                              | 0110        |
| 7                              | 0100                                              | 0111        |
| 8                              | 1100                                              | 1000        |
| 9                              | 1101                                              | 1001        |
| 10                             | 1111                                              | 1010        |
| 11                             | 1110                                              | 1011        |
| 12                             | 1010                                              | 1100        |
| 13                             | 1011                                              | 1101        |
| 14                             | 1001                                              | 1110        |
| 15                             | 1000                                              | 1111        |

**B**

| FOXP3 | IL-2 | PTEN | TCR | RAS | CD25 | PI3K | AKT | MTORC1 | MTORC2 | Decimal<br>assuming<br>Gray code | Decimal<br>assuming<br>binary code |
|-------|------|------|-----|-----|------|------|-----|--------|--------|----------------------------------|------------------------------------|
| 1     | 0    | 1    | 1   | 1   | 1    | 1    | 0   | 0      | 1      | 849                              | 761                                |
| 1     | 0    | 1    | 0   | 1   | 1    | 1    | 0   | 0      | 1      | 814                              | 697                                |

**Figure S6.** System trajectories for different delay setups in high and low Ag dose scenarios

The heat maps are created following the method described in Materials and Methods. Each heat map shows 1000 simulation trajectories, with each row being a single trajectory from round 0 (initial state), until round 30. The heat maps are shown here for 15 delay setups,  $S_{D1}$ - $S_{D15}$  (Figure 2D). The effect of delays on the overall system behavior, both transients and the time to reach steady state can be seen from the changes in colors. Increasing the delay on the MAPK pathway (top to bottom) reduces the transient behavior (red and orange points on the heat map), while increasing the delay on the Akt/mTOR pathway (left to right) increases the percentage of trajectories with transient, as well as the duration of transient. The effect of delays on the overall system behavior in the low Ag dose scenario is only seen in the time when the switch to steady state occurs.

(A) Heat maps in high Ag dose scenario. (B) Heat maps in low Ag dose scenario.

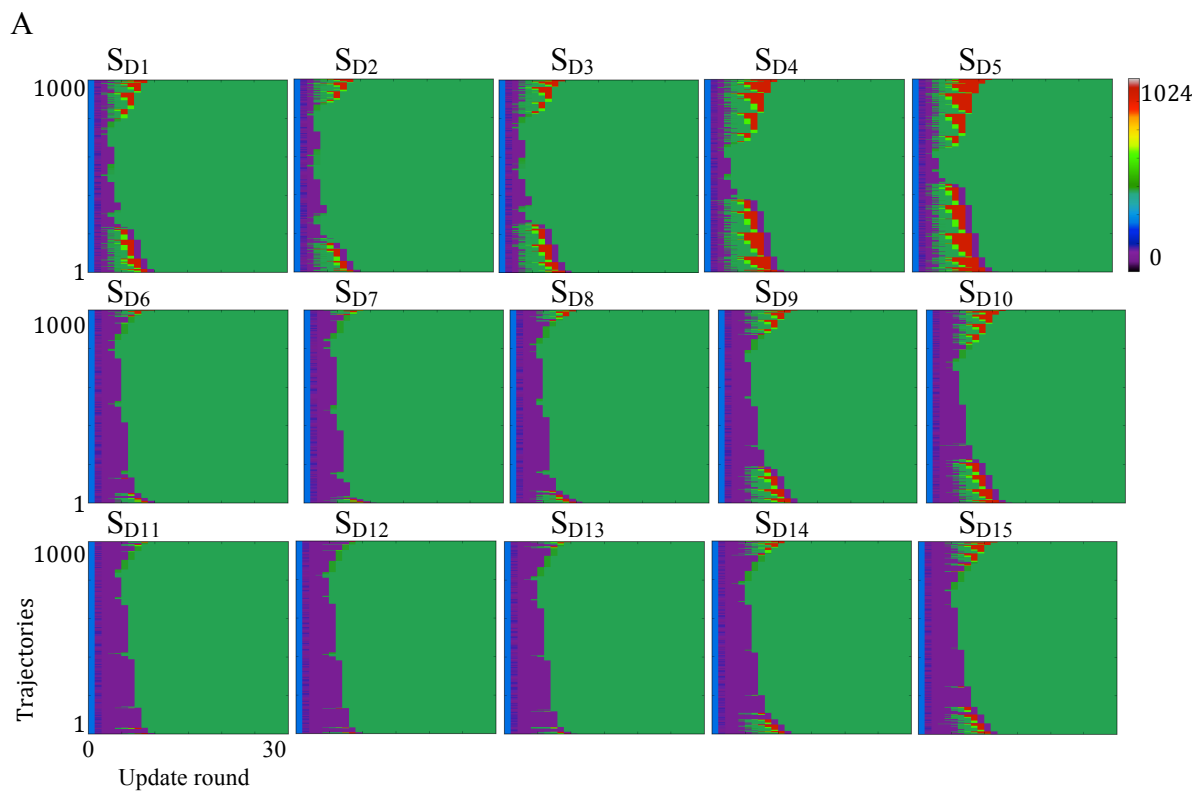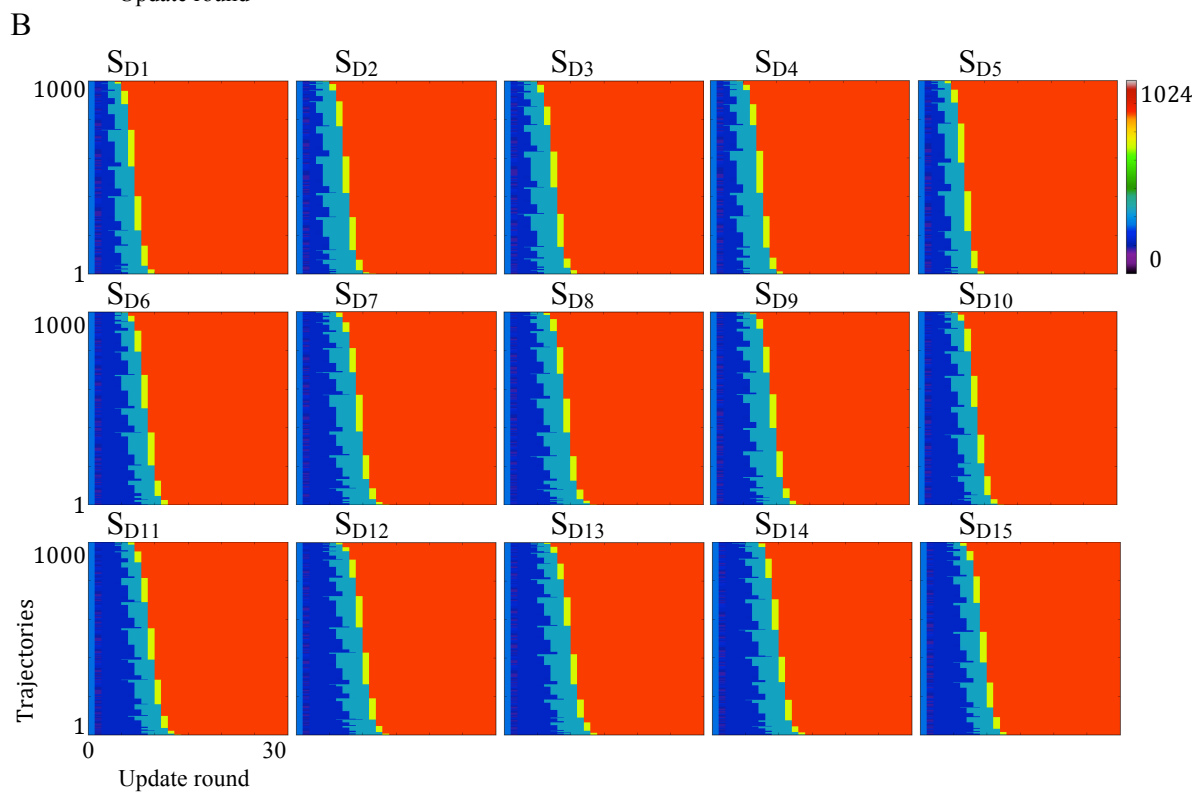

**Figure S7.** Attractor A1-A11 occurrence frequency in scenarios T1-T12

This figure shows the differences in attractor presence for different antigen removal scenarios (x axis).

The attractors are grouped according to three main phenotypes, Foxp3- IL-2-, IL-2+ and Foxp3+.

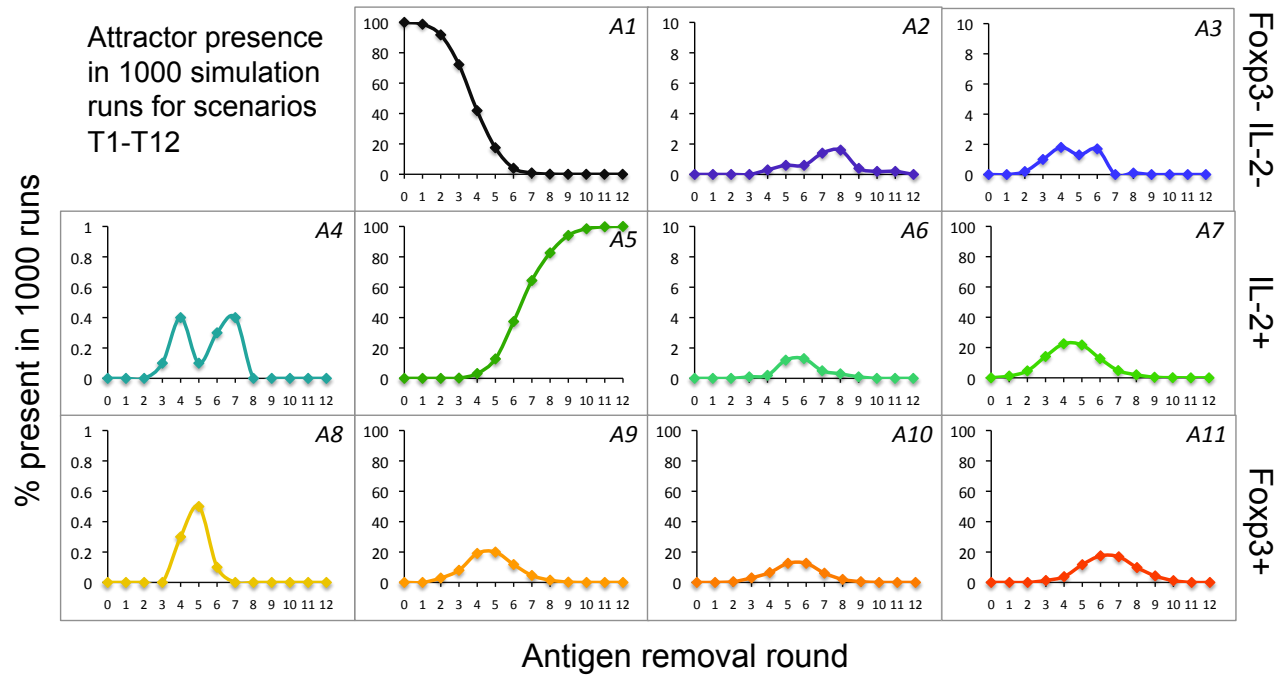

**Figure S8.** Analysis of effects of different delay setups for high Ag dose + Ag removal scenario

In the scenario of high Ag dose + Ag removal at round 6 (T6), we study the effect of delays on phenotype distribution in steady state, and on transient system behavior for 15 delay setups,  $S_{D1}$ - $S_{D15}$  (Figure 2D). Changing the delays alters the relative proportions of Th and Treg cells but all setups result in a mixed Th/Treg population. The results show that the percentage of Foxp3- IL-2- phenotype always remains low, and that it only slightly increases in the last five delay setups that have the longest MAPK pathway. The effect on the ratio between Foxp3+ and IL-2+ phenotypes is much stronger when MAPK delay is small compared to the Akt/mTOR pathway delay ( $S_{D1}$ - $S_{D5}$ ). The heat maps are created following the method described in Materials and Methods. Each heat map shows 1000 simulation trajectories, with each row being a single trajectory from round 0 (initial state), until round 30. (A) Changes in distribution of Foxp3-IL-2-, Foxp3+, and IL-2+ phenotypes for the 15 delay setups. (B) Heat maps of system trajectories in scenario T6, for the 15 delay setups.

A

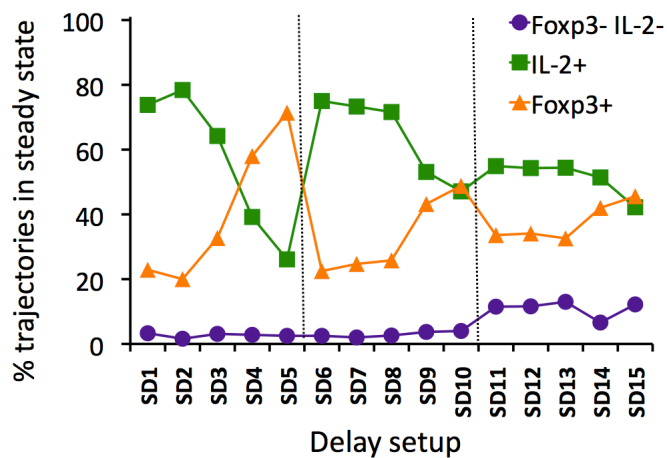

B

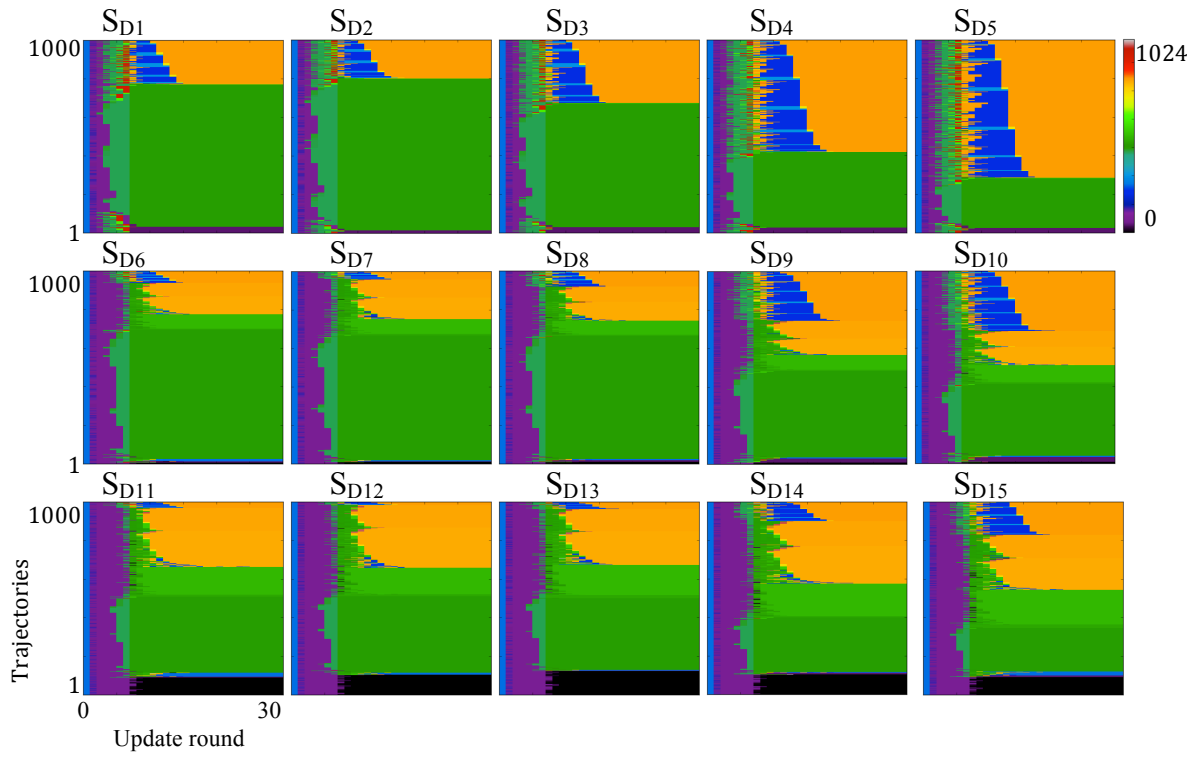

**Figure S9.** Signal propagation and element trajectories of different attractors in scenario T6

This figure shows signaling paths, feedback and feed-forward loops critical for fate decision in scenario T6 (see Figure 6), and element trajectories from initial to steady state, averaged across simulations leading to a specific attractor.





C

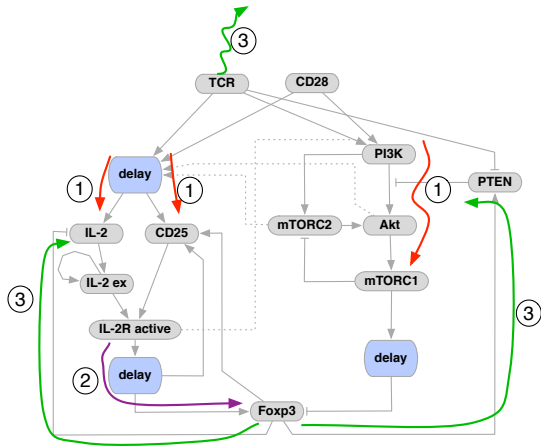

A3

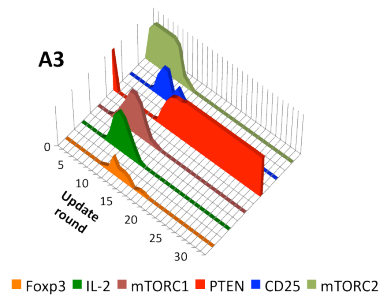

D

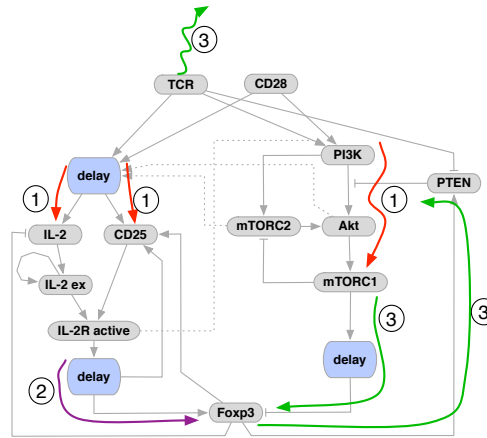

A4

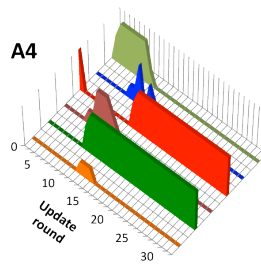

(C) Attractor A3, 17 trajectories: IL-2, CD25, mTORC1 and mTORC2 are activated early (1). Fast activation of positive branch of global iFFL leads to STAT5 activation and expression of FoXP3 (2), which is followed by negative feedback from FoXP3 to IL-2 (3). The feedback between CD25 and STAT5 is not established due to delay: activation of CD25 propagates to STAT5, but CD25 is switched “off” due to antigen removal (3), before STAT5 activation feeds back to it. Active STAT5 will briefly re-activate CD25, but eventually both CD25 and STAT5 are turned to “off” state. FoXP3 is expressed long enough to activate PTEN when antigen is removed (3). Since IL-2R and STAT5 are not active, FoXP3 is permanently switched to “off” state, as well as the PI3K/Akt/mTOR pathway.

(D) Attractor A4, 3 trajectories: Very similar to A3, except that FoXP3 is active very briefly and therefore it does not inhibit IL-2, allowing for longer expression and secretion of IL-2. Delayed negative branch of iFFL leading to FoXP3 inhibition, timely feedback from FoXP3 to PTEN, delayed feedback between CD25 and STAT5, and delayed feedback from FoXP3 to IL-2 are critical for this attractor.

**E**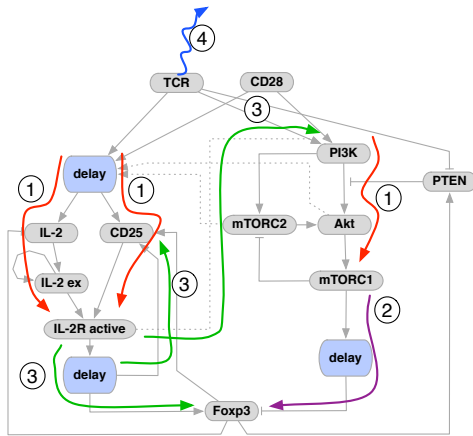**F**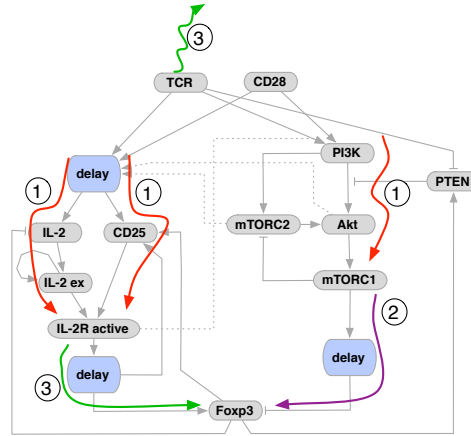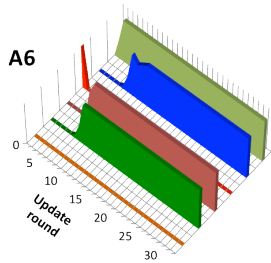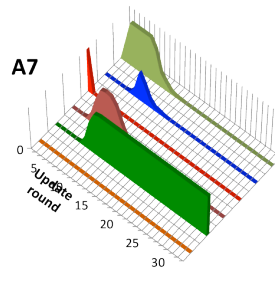

■ Foxp3 
 ■ IL-2 
 ■ mTORC1 
 ■ PTEN 
 ■ CD25 
 ■ mTORC2

(E) Attractor A6, 13 trajectories: Very similar to A5, the only difference is in Ras (not shown), which is “on” in attractor A5, and “off” in A6. IL-2, CD25, mTORC1 and mTORC2 are activated early (1). On most paths, negative branch of iFFL is activated faster, leading to inhibition of Foxp3 by mTOR (3). Activation of most of the paths occurs early enough, such that antigen removal (4) does not affect already established cell fate. Feedback between CD25 and STAT5 is not delayed, and thus, CD25 and STAT5 are active in steady-state. IL-2R positively regulates PI3K pathway, thus mTOR remains active after antigen removal.

(F) Attractor A7, 127 trajectories: IL-2, CD25, mTORC1 and mTORC2 are activated early (1). On most paths, inhibition of Foxp3 by mTOR (2) takes place before its activation (3). Antigen removal occurs early enough (3), switching “off” the PI3K/Akt/mTOR path, as well as preventing activation of positive feedback between CD25 and STAT5.



**Figure S10.** Transient behavior and phenotypes in the presence of inhibitors and high Ag dose

In this analysis, all attractors are added at simulation round 6.

**A**

| Attractors     | <i>iNFAT</i> |     |     |     | <i>iAkt</i> | <i>imTORC1</i> |
|----------------|--------------|-----|-----|-----|-------------|----------------|
|                | A1           | A2  | A3  | A4  | A5          | A6             |
| Foxp3          |              |     |     |     |             |                |
| IL-2           |              |     |     |     |             |                |
| PTEN           |              |     |     |     |             |                |
| TCR            |              |     |     |     |             |                |
| Ras            |              |     |     |     |             |                |
| CD25           |              |     |     |     |             |                |
| PI3K           |              |     |     |     |             |                |
| Akt            |              |     |     |     |             |                |
| mTORC1         |              |     |     |     |             |                |
| mTORC2         |              |     |     |     |             |                |
| Attractor size | 290          | 110 | 296 | 304 | 1000        | 1000           |

**B**

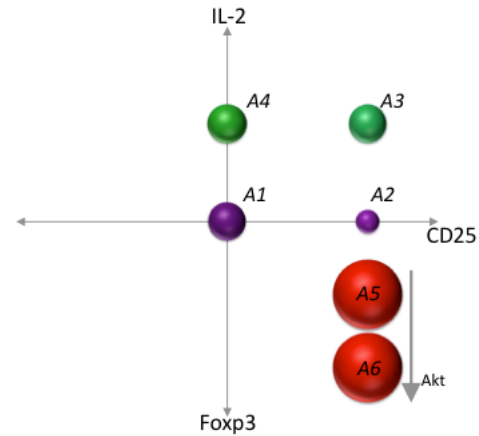

**C**

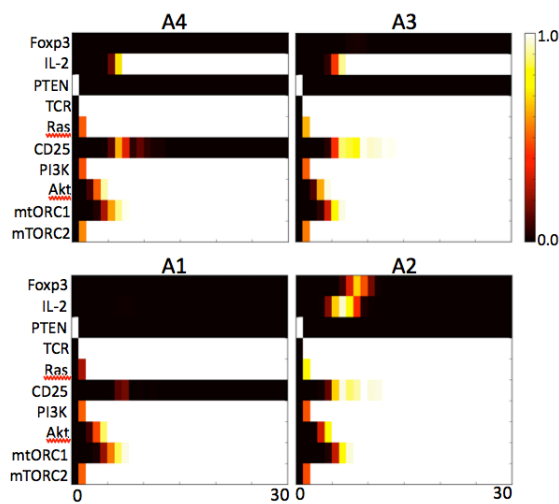

**D**

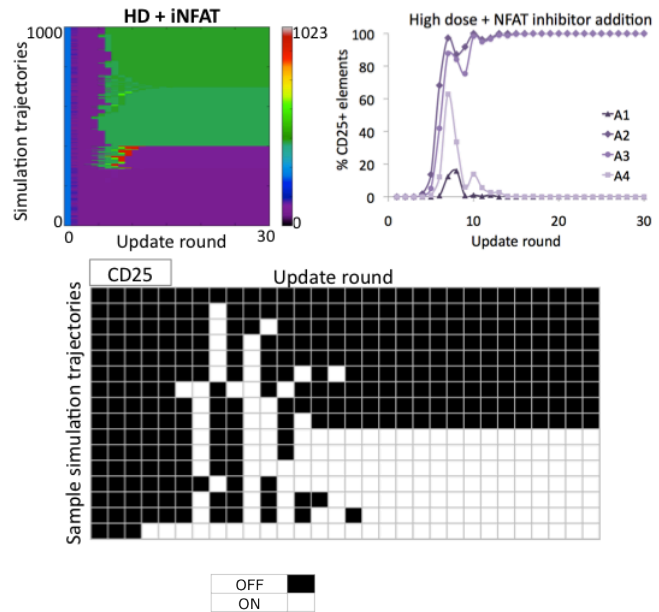

(A) 4 attractors are observed when NFAT inhibitor is added (*iNFAT* case, attractors A1-A4), and a single attractor is observed for adding either Akt (*iAkt*, attractor A6) or mTORC1 (*imTORC1*, attractor A6) inhibitor; steady state values of ten elements (Foxp3, IL-2, PTEN, TCR, Ras, CD25, PI3K, Akt, mTORC1, mTORC2) in these attractors, and the number of simulation trajectories ending in each attractor for 1000 simulation runs. (B) Attractors, sizes of attractors and their relationships with respect to key differentiating elements. (C) Trajectories of 10 elements (Foxp3, IL-2, PTEN, TCR, Ras, CD25, PI3K, Akt, mTORC1, mTORC2), averaged across all simulation runs leading to a given attractor (A1-A4). (D) Heat map of all 1000 simulation trajectories (top left). In all

four attractors resulting from addition of NFAT inhibitor CD25 oscillates several times before reaching the steady value (top right). Oscillations are not resulting from averaging across simulations: oscillations exist within a single run, shown here for a sample of trajectories (bottom).

**Figure S11.** Analysis of effects of switching model elements OFF

We analyzed effects of switching individual model elements OFF on the transient behavior and steady-state values of Foxp3, IL-2 PTEN, CD25, mTORC1, and mTORC2, for the following scenarios: high Ag dose (HD), low Ag dose (LD), high Ag dose + Ag removal at round 6 (T6), and high Ag dose + TGF- $\beta$  (HD + TGF- $\beta$ ).

In high Ag dose scenario, given two model elements,  $E_i \in \{26 \text{ model elements that are turned OFF (see tables A to D)}\}$  and  $E_j \in \{\text{Foxp3, IL-2 PTEN, CD25, mTORC1, mTORC2}\}$ , there are four different effects that can be observed from turning OFF a model element  $E_i$ : (i) it does not have an effect on an element  $E_j$ , (ii) it switches the element  $E_j$  ON (if  $E_i$  is its negative regulator), (iii) it switches the element  $E_j$  OFF (if  $E_i$  is its necessary positive regulator), and (iv) does not change qualitatively element  $E_j$ , but it changes its behavior in time (slows down or speeds up the transient, increases or decreases transient magnitude), or its average steady state value. In low Ag dose scenario, since PTEN plays a key role, turning PTEN OFF results in oscillation of all elements  $E_j$ , due to the negative feedback loop between Akt, mTORC1 and mTORC2.

In the original T6 scenario, average steady-state value for many elements is different from OFF ('0') and ON ('1'). Turning OFF elements on Akt/mTOR and CD25/STAT5 pathways affects the transient behavior of elements  $E_j$ , as well as their average steady-state value. The only element that exhibits slightly different behavior in this scenario is mTORC2, which either has a similar transient behavior like in the original case, but returns to OFF in steady-state (when turning OFF elements on MAPK pathway, NFAT, NF $\kappa$ B, or CD25/STAT5 pathway), or it follows exactly the same behavior as in the original scenario. We also analyzed the effect of timing in turning OFF NFAT, Akt, and mTORC1, which effectively represents addition of inhibitors to the system. We observed that the timing does not affect the results of adding Akt and mTORC1 inhibitor, while adding NFAT inhibitor (which is activated early in simulations by TCR) can result in different phenotypes, if added at later rounds (see fig. S10 for more details).

A

| Response | High Ag dose (HD) + switching OFF element: |       |     |     |     |     |     |     |      |      |      |      |       |      |       |           |          |      |           |          |      |     |        |        |      |       |          |     |
|----------|--------------------------------------------|-------|-----|-----|-----|-----|-----|-----|------|------|------|------|-------|------|-------|-----------|----------|------|-----------|----------|------|-----|--------|--------|------|-------|----------|-----|
|          | CD28                                       | PKC-θ | Ras | AP1 | Jun | Fos | ERK | JNK | NFAT | NFκB | IL-2 | CD25 | STAT5 | JAK3 | Foxp3 | PI3K_HIGH | PI3K_LOW | PTEN | PIP3_HIGH | PIP3_LOW | PDK1 | Akt | mTORC1 | mTORC2 | S6K1 | Smad3 | Original |     |
| Foxp3    | -0                                         | -0    | -0  | -0  | -0  | -0  | -0  | -0  | -0   | -0   | -0   | -0   | -0    | -0   | -0    | -1        | =        | =    | =         | -1       | =    | -1  | -1     | -1     | -1   | =     | =        | ✓,0 |
| IL-2     | -0                                         | -0    | -0  | -0  | -0  | -0  | -0  | -0  | -0   | -0   | -0   | =    | =     | =    | ∧,1   | V,0       | =        | =    | V,0       | =        | V,0  | V,0 | V,0    | V,0    | V,0  | =     | =        | ✓,1 |
| PTEN     | =                                          | =     | =   | =   | =   | =   | =   | =   | =    | =    | =    | =    | =     | =    | =     | =         | =        | =    | -0        | =        | =    | =   | =      | =      | =    | =     | =        | ✓,0 |
| CD25     | -0                                         | -0    | -0  | -0  | -0  | -0  | -0  | -0  | -0   | -0   | -0   | =    | =     | =    | =     | =         | =        | =    | =         | =        | =    | =   | =      | =      | =    | =     | =        | ✓,1 |
| STAT5    | -0                                         | -0    | -0  | -0  | -0  | -0  | -0  | -0  | -0   | -0   | -0   | -0   | -0    | -0   | =     | =         | =        | =    | =         | =        | =    | =   | =      | =      | =    | =     | =        | ✓,1 |
| mTORC1   | -0                                         | =     | =   | =   | =   | =   | =   | =   | =    | =    | =    | =    | =     | =    | =     | =         | =        | =    | =         | =        | =    | -0  | -0     | -0     | =    | =     | =        | ✓,1 |
| mTORC2   | -0                                         | =     | =   | =   | =   | =   | =   | =   | =    | =    | =    | =    | =     | =    | =     | =         | =        | =    | =         | =        | =    | =   | =      | =      | =    | =     | =        | ✓,1 |

B

| Response | Low Ag dose (LD) + switching OFF element: |       |     |     |     |     |     |     |      |      |      |      |       |      |       |           |          |      |           |          |      |     |        |        |      |       |          |     |
|----------|-------------------------------------------|-------|-----|-----|-----|-----|-----|-----|------|------|------|------|-------|------|-------|-----------|----------|------|-----------|----------|------|-----|--------|--------|------|-------|----------|-----|
|          | CD28                                      | PKC-θ | Ras | AP1 | Jun | Fos | ERK | JNK | NFAT | NFκB | IL-2 | CD25 | STAT5 | JAK3 | Foxp3 | PI3K_HIGH | PI3K_LOW | PTEN | PIP3_HIGH | PIP3_LOW | PDK1 | Akt | mTORC1 | mTORC2 | S6K1 | Smad3 | Original |     |
| Foxp3    | -0                                        | -0    | -0  | -0  | -0  | -0  | -0  | -0  | -0   | -0   | -0   | -0   | -0    | -0   | -0    | =         | -0       | V,∞  | =         | =        | =    | =   | =      | =      | -0   | =     | =        | ✓,1 |
| IL-2     | -0                                        | -0    | -0  | -0  | -0  | -0  | -0  | -0  | -0   | -0   | -0   | ∧,1  | ∧,1   | ∧,1  | ∧,1   | =         | -0       | V,∞  | =         | =        | =    | =   | =      | =      | -0   | =     | =        | ✓,0 |
| PTEN     | =                                         | =     | =   | =   | =   | =   | =   | =   | =    | =    | =    | =    | =     | =    | =     | =         | =        | =    | -0        | =        | =    | =   | =      | =      | =    | =     | =        | -1  |
| CD25     | -0                                        | -0    | -0  | -0  | -0  | -0  | -0  | -0  | -0   | -0   | -0   | -0   | =     | =    | =     | =         | -0       | V,∞  | =         | =        | =    | =   | =      | =      | -0   | =     | =        | ✓,1 |
| STAT5    | -0                                        | -0    | -0  | -0  | -0  | -0  | -0  | -0  | -0   | -0   | -0   | -0   | -0    | -0   | =     | =         | =        | V,∞  | =         | =        | =    | =   | =      | =      | -0   | =     | =        | ✓,1 |
| mTORC1   | -0                                        | -0    | -0  | -0  | -0  | -0  | -0  | -0  | -0   | -0   | -0   | -0   | -0    | -0   | -0    | -0        | -0       | V,∞  | -0        | -0       | -0   | -0  | -0     | -0     | -0   | -0    | -0       | -0  |
| mTORC2   | -0                                        | =     | =   | =   | =   | =   | =   | =   | =    | =    | =    | =    | =     | =    | =     | =         | -0       | V,∞  | V,∞       | V,∞      | =    | =   | =      | =      | -0   | =     | =        | ✓,1 |

Legend:

The first component in each table entry describes element transient behavior between initial state and final simulated state, the second component describes average element value in steady-state across 1000 simulations.

*Transient:*

- ✓: Single or double transient exists in the original case
- = : Transient behavior same as in Original for the given scenario
- : No transient
- ∧ : Transient exists, higher than original
- V : Transient exists, lower than original

*Steady-state value:*

- [0,1] : Steady-state value is in this interval
- = : Steady state value same as in Original for the given scenario
- ∞ : Oscillatory behavior, not reaching steady-state
- d : Delayed transient when compared to original case
- £ : Takes very long to reach steady state (e.g., at round 19)
- € : Increases to 0.8, then decreases and settles at steady state value 0.4 at round 20
- ¥ : Oscillates early and then settles at steady-state at round 16

C

| Response | HD + Ag removal (T6) + switching OFF element: |       |      |      |      |      |      |      |      |      |      |        |        |        |        |           |          |        |           |          |         |         |         |         |      |       |                     |        |
|----------|-----------------------------------------------|-------|------|------|------|------|------|------|------|------|------|--------|--------|--------|--------|-----------|----------|--------|-----------|----------|---------|---------|---------|---------|------|-------|---------------------|--------|
|          | CD28                                          | PKC-θ | Ras  | AP1  | Jun  | Fos  | ERK  | JNK  | NFAT | NFκB | IL-2 | CD25   | STAT5  | JAK3   | Foxp3  | PI3K_HIGH | PI3K_LOW | PTEN   | PIP3_HIGH | PIP3_LOW | PDK1    | Akt     | mTORC1  | mTORC2  | S6K1 | Smad3 | Original            |        |
| Foxp3    | -0                                            | -0    | -0   | -0   | -0   | -0   | -0   | -0   | -0   | -0   | -0   | -0     | -0     | -0     | -0     | ∧, 0.6    | =        | ∨, 0.3 | ∧, 0.6    | =        | ∧, 0.6  | ∧, 0.6  | ∧, 0.75 | ∧, 0.6  | =    | =     | ∧, 0.5 <sup>E</sup> |        |
| IL-2     | -0                                            | -0    | -0   | -0   | -0   | -0   | -0   | -0   | -0   | -0   | -0   | ∧, 0.9 | ∧, 0.9 | ∧, 0.9 | ∧, 0.9 | ∨, 0.2    | =        | =      | ∨, 0.2    | =        | ∨, 0.2  | ∨, 0.2  | ∨, 0.15 | ∨, 0.2  | =    | =     | ∧, 0.4 <sup>E</sup> |        |
| PTEN     | -0                                            | -0    | -0   | -0   | -0   | -0   | -0   | -0   | -0   | -0   | -0   | -0     | -0     | -0     | -0     | ∧, 0.65   | =        | -0     | ∧, 0.65   | =        | ∧, 0.65 | ∧, 0.65 | ∧, 0.75 | ∧, 0.65 | =    | =     | ∧, 0.5              |        |
| CD25     | -0                                            | -0    | -0   | -0   | -0   | -0   | -0   | -0   | -0   | -0   | ∨, 0 | -0     | ∨, 0   | ∨, 0   | =      | ∨, 0.6    | =        | =      | ∨, 0.6    | =        | ∨, 0.6  | ∨, 0.6  | =       | ∨, 0.6  | =    | =     | ∧, 0.7 <sup>*</sup> |        |
| STAT5    | -0                                            | -0    | -0   | -0   | -0   | -0   | -0   | -0   | -0   | -0   | -0   | -0     | -0     | -0     | =      | ∨, 0.6    | =        | =      | ∨, 0.6    | =        | ∨, 0.6  | ∨, 0.6  | =       | ∨, 0.6  | =    | =     | ∧, 0.7              |        |
| mTORC1   | -0                                            | ∨, 0  | ∨, 0 | ∨, 0 | ∨, 0 | ∨, 0 | ∨, 0 | ∨, 0 | ∨, 0 | ∨, 0 | ∨, 0 | ∨, 0   | ∨, 0   | ∨, 0   | ∧, 0.4 | -0        | =        | ∧, 0.4 | -0        | =        | -0      | -0      | -0      | -0      | =    | =     | ∧, 0.25             |        |
| mTORC2   | -0                                            | =0    | =0   | =0   | =0   | =0   | =0   | =0   | =0   | =0   | =0   | =0     | =0     | =0     | =      | -0        | =        | =      | =         | =        | =       | =       | =       | =       | -0   | =     | =                   | ∧, 0.4 |

D

| Response | HD + TGF-β + switching OFF element: |       |     |     |     |     |     |     |      |      |      |      |       |      |       |           |          |      |           |          |      |     |        |        |      |       |          |    |
|----------|-------------------------------------|-------|-----|-----|-----|-----|-----|-----|------|------|------|------|-------|------|-------|-----------|----------|------|-----------|----------|------|-----|--------|--------|------|-------|----------|----|
|          | CD28                                | PKC-θ | Ras | AP1 | Jun | Fos | ERK | JNK | NFAT | NFκB | IL-2 | CD25 | STAT5 | JAK3 | Foxp3 | PI3K_HIGH | PI3K_LOW | PTEN | PIP3_HIGH | PIP3_LOW | PDK1 | Akt | mTORC1 | mTORC2 | S6K1 | Smad3 | Original |    |
| Foxp3    | =                                   | =     | =   | =   | =   | =   | =   | =   | =    | -0   | =    | =    | =     | =    | -0    | =         | =        | =    | =         | =        | =    | =   | =      | =      | =    | ∨, 0  | ∧, 1     |    |
| IL-2     | -0                                  | -0    | -0  | -0  | -0  | -0  | -0  | -0  | -0   | -0   | -0   | -0   | -0    | -0   | ∧, 1  | -0        | -0       | -0   | -0        | -0       | -0   | -0  | -0     | -0     | -0   | -0    | ∧, 1     | -0 |
| PTEN     | =                                   | =     | =   | =   | =   | =   | =   | =   | =    | =    | =    | =    | =     | =    | =     | =         | =        | =    | =         | =        | =    | =   | =      | =      | =    | =     | ∧, 0     |    |
| CD25     | =                                   | =     | =   | =   | =   | =   | =   | =   | =    | =    | =    | -0   | =     | =    | d, 1  | =         | =        | =    | =         | =        | =    | =   | =      | =      | =    | d, 1  | ∧, 1     |    |
| STAT5    | -0                                  | -0    | -0  | -0  | -0  | -0  | -0  | -0  | -0   | -0   | -0   | -0   | -0    | -0   | ∧, 1  | -0        | -0       | -0   | -0        | -0       | -0   | -0  | -0     | -0     | -0   | ∧, 1  | -0       |    |
| mTORC1   | -0                                  | =     | =   | =   | =   | =   | =   | =   | =    | =    | =    | =    | =     | =    | =     | -0        | =        | =    | -0        | =        | -0   | -0  | -0     | -0     | =    | =     | ∧, 1     |    |
| mTORC2   | -0                                  | =     | =   | =   | =   | =   | =   | =   | =    | =    | =    | =    | =     | =    | =     | -0        | =        | =    | =         | =        | =    | =   | =      | =      | -0   | =     | ∧, 1     |    |

E

| Response | HD + Inhibitor addition at different times |                      |                      |                      |                                                                 |                     |                     |                     |                                                            |                        |                        |                        |
|----------|--------------------------------------------|----------------------|----------------------|----------------------|-----------------------------------------------------------------|---------------------|---------------------|---------------------|------------------------------------------------------------|------------------------|------------------------|------------------------|
|          | iNFAT                                      |                      |                      |                      | iAkt                                                            |                     |                     |                     | imTORC1                                                    |                        |                        |                        |
|          | T <sub>INFAT</sub> 0*                      | T <sub>INFAT</sub> 3 | T <sub>INFAT</sub> 6 | T <sub>INFAT</sub> 9 | T <sub>IAkt</sub> 0                                             | T <sub>IAkt</sub> 3 | T <sub>IAkt</sub> 6 | T <sub>IAkt</sub> 9 | T <sub>imTORC1</sub> 0                                     | T <sub>imTORC1</sub> 3 | T <sub>imTORC1</sub> 6 | T <sub>imTORC1</sub> 9 |
| Foxp3    | No activation                              | No activation        | Small transient      | Higher transient     | Always switches to 1, with transient starting later T0->T9      |                     |                     |                     | Always switches to 1, with transient shifted later T0->T9  |                        |                        |                        |
| IL-2     | No activation                              | No activation        | Steady state 0.6     | Steady state 0.9     | Always switches back to 0, with transient starting later T0->T9 |                     |                     |                     | Always switches to 0, with transient starting later T0->T9 |                        |                        |                        |
| PTEN     | No effect                                  |                      |                      |                      | No effect                                                       |                     |                     |                     | No effect                                                  |                        |                        |                        |
| CD25     | No activation                              | No activation        | Steady state 0.4     | Steady state 0.95    | No effect                                                       |                     |                     |                     | No effect                                                  |                        |                        |                        |



**Figure S12.** Analysis of effects of changing initial conditions

We analyzed the effects of randomizing initial values of model elements. We study three different cases: R1 –initial values of model elements (not including stimulations and genes, the latter being set to OFF) are random, R2 - initial values of model elements (not including stimulations, including genes) are random, and R3 - initial values of all model elements are random. Cases R1 and R2 are simulated for four different scenarios, high Ag dose (HD) stimulation, high Ag dose + TGF- $\beta$  (HD + TGF- $\beta$ ), low Ag dose (LD) stimulation, and no stimulation present. In case R3 all elements are set to random, so we consider only one scenario here. The heat maps show 2000 system trajectories. The HD (first column) and HD + TGF- $\beta$  (second column) scenarios steady states are not affected by random initial conditions, and only show some delay in reaching steady state. The largest impact of randomizing initial element values is observed in the LD (third column) scenario, where randomizing initial values results in a mixed population of phenotypes in steady state. In the case of no stimulation (fourth column, first and second row), most of the trajectories show no activation, although there is a small percentage of trajectories (orange and green) that result in activation.

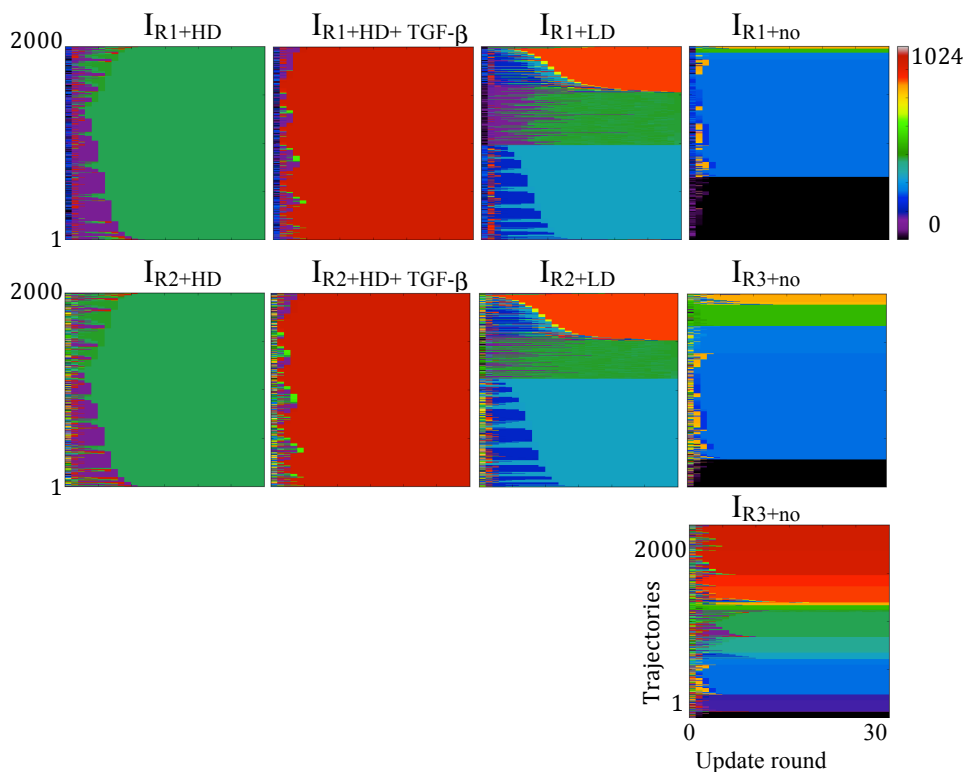

Supplement: NIHMS582566-supplement-Supplementary_Materials.pdf [file NIHMS582566-supplement-Supplementary_Materials.pdf]
